# Supplementary material
Source: Elsevier journal article supplement (https://www.sciencedirect.com/science/article/pii/S2531043719302089)
Supplement: mmc1 [file S2531043719302089:mmc1.pdf]

To the Editor of "Pumonology"

Dear Dear Professor N. Ambrosino,

Thank you very much for all your valuable comments!

We would like to resubmit the following article for your consideration in the journal *Pumonology: Chronic Obstructive Pulmonary Disease and Phenotypes: A state-of-the-art.* by Alexandru Corlateanu, Yamely Mendez, Yafeng Wang, Ricardo de Jesus Avendaño Garnica, Botnaru Victor, Nikolaos Siafakas.

1. To include tables for definitions and classifications  
We added 2 tables to the manuscript
2. To revise English  
English was revised by the native English speaker
3. To include references for all papers and/or guidelines cited in the text  
We updated list of the references
4. To revise format of references according to the journal rules  
We revised format of references.

With kind regards,

Alexandru Corlateanu, MD, PhD  
Associate Professor, Department of Respiratory Medicine,  
State University of Medicine and Pharmacy "Nicolae Testemitanu", Chisinau, Moldova  
GOLD National Leader for Moldova  
Member of GINA Assembly for Moldova

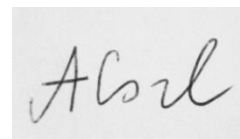

26.10.2019
